# Supplementary material for: Controlling for Structural Changes in the Workforce Influenced Occupational Class Differences in Disability Retirement Trends
Source: PubMed Central journal article supplement (PMC6539389; doi:10.3390/ijerph16091523), 2019-04-30
Supplement: ijerph-16-01523-s001.pdf [file ijerph-16-01523-s001.pdf]

## SUPPLEMENTARY MATERIAL CAPTIONS

**Table S1.** Distribution of education (%) in the original and matched sample by gender, occupational class and calendar year.

|                                                | Original sample |           |          | Matched sample |           |          |
|------------------------------------------------|-----------------|-----------|----------|----------------|-----------|----------|
|                                                | Primary         | Secondary | Tertiary | Primary        | Secondary | Tertiary |
| <b>Men</b>                                     |                 |           |          |                |           |          |
| Upper-level non-manual employees               |                 |           |          |                |           |          |
| 2007                                           | 4.4             | 14.3      | 81.3     | 4.4            | 15.5      | 80.1     |
| 2010                                           | 4.1             | 14.9      | 81.0     | 4.2            | 14.8      | 81.0     |
| 2013                                           | 3.5             | 13.3      | 83.2     | 3.8            | 13.8      | 82.4     |
| Lower-level non-manual employees               |                 |           |          |                |           |          |
| 2007                                           | 13.8            | 39.2      | 47.0     | 14.9           | 47.2      | 37.9     |
| 2010                                           | 12.1            | 41.6      | 46.3     | 12.5           | 42.8      | 44.7     |
| 2013                                           | 10.1            | 41.2      | 48.7     | 11.9           | 42.2      | 45.9     |
| Skilled manual workers                         |                 |           |          |                |           |          |
| 2007                                           | 26.0            | 68.9      | 5.1      | 22.9           | 72.5      | 4.6      |
| 2010                                           | 22.7            | 71.6      | 5.7      | 22.8           | 71.8      | 5.4      |
| 2013                                           | 20.6            | 73.7      | 5.7      | 23.1           | 71.6      | 5.3      |
| Unskilled manual workers                       |                 |           |          |                |           |          |
| 2007                                           | 35.7            | 56.5      | 7.8      | 30.9           | 60.8      | 8.3      |
| 2010                                           | 31.6            | 59.6      | 8.8      | 32.1           | 59.4      | 8.5      |
| 2013                                           | 29.2            | 61.9      | 8.9      | 32.2           | 59.7      | 8.1      |
| Self-employed farmers and agricultural workers |                 |           |          |                |           |          |
| 2007                                           | 30.1            | 58.1      | 11.8     | 28.9           | 62.3      | 8.8      |
| 2010                                           | 25.3            | 61.3      | 13.4     | 25.9           | 61.1      | 13.0     |
| 2013                                           | 23.0            | 61.5      | 15.5     | 25.2           | 61.1      | 13.7     |
| Other self-employed                            |                 |           |          |                |           |          |
| 2007                                           | 25.6            | 46.8      | 27.6     | 23.6           | 50.3      | 26.1     |
| 2010                                           | 22.8            | 48.8      | 28.4     | 23.4           | 49.3      | 27.3     |
| 2013                                           | 20.3            | 50.4      | 29.3     | 22.9           | 49.6      | 27.5     |
| <b>B) Women</b>                                |                 |           |          |                |           |          |
| Upper-level non-manual employees               |                 |           |          |                |           |          |
| 2007                                           | 2.3             | 9.7       | 88.0     | 2.0            | 10.3      | 87.7     |
| 2010                                           | 1.9             | 8.8       | 89.3     | 2.0            | 9.2       | 88.8     |
| 2013                                           | 1.4             | 7.4       | 91.2     | 1.9            | 8.6       | 89.5     |
| Lower-level non-manual employees               |                 |           |          |                |           |          |
| 2007                                           | 12.2            | 44.1      | 43.7     | 10.4           | 48.2      | 41.4     |
| 2010                                           | 9.5             | 44.6      | 45.9     | 9.2            | 46.0      | 44.8     |
| 2013                                           | 7.2             | 44.4      | 48.4     | 9.0            | 46.2      | 44.8     |
| Skilled manual workers                         |                 |           |          |                |           |          |
| 2007                                           | 32.3            | 56.6      | 11.1     | 25.2           | 62.6      | 12.2     |
| 2010                                           | 26.8            | 60.1      | 13.1     | 25.3           | 62.4      | 12.3     |
| 2013                                           | 23.2            | 62.3      | 14.5     | 26.8           | 60.4      | 12.8     |
| Unskilled manual workers                       |                 |           |          |                |           |          |

|                                                |      |      |      |      |      |      |
|------------------------------------------------|------|------|------|------|------|------|
| 2007                                           | 33.3 | 60.7 | 6.0  | 25.4 | 66.2 | 8.4  |
| 2010                                           | 28.4 | 63.4 | 8.2  | 26.5 | 64.7 | 8.8  |
| 2013                                           | 24.6 | 66.3 | 9.1  | 28.1 | 63.7 | 8.2  |
| Self-employed farmers and agricultural workers |      |      |      |      |      |      |
| 2007                                           | 20.2 | 59.0 | 20.8 | 17.5 | 63.3 | 19.4 |
| 2010                                           | 16.2 | 59.7 | 24.1 | 18.0 | 61.6 | 20.4 |
| 2013                                           | 12.7 | 60.2 | 27.1 | 16.0 | 61.9 | 22.1 |
| Other self-employed                            |      |      |      |      |      |      |
| 2007                                           | 16.7 | 47.4 | 35.9 | 12.5 | 49.8 | 37.8 |
| 2010                                           | 13.3 | 47.7 | 39.0 | 13.3 | 47.7 | 39.0 |
| 2013                                           | 11.3 | 46.3 | 42.4 | 13.6 | 47.7 | 38.7 |

---

**Table S2.** Year-specific distribution (%) of the matched study population over the study period by background characteristics among (A) men and (B) women

|                                                |        |        |        | Change (percentage points) |               |               |
|------------------------------------------------|--------|--------|--------|----------------------------|---------------|---------------|
|                                                | 2007   | 2010   | 2013   | 2007-<br>2010              | 2010-<br>2013 | 2007-<br>2013 |
|                                                | N      | N      | N      |                            |               |               |
| A) Men                                         | 456365 | 456365 | 456365 |                            |               |               |
| Age                                            |        |        |        |                            |               |               |
| 30-34                                          | 15.6   | 16.4   | 16.7   | 0.8                        | 0.3           | 1.1           |
| 35-39                                          | 16.5   | 15.1   | 16.5   | -1.4                       | 1.4           | 0.0           |
| 40-44                                          | 18.3   | 17.9   | 16.3   | -0.4                       | -1.6          | -2.0          |
| 45-49                                          | 17.7   | 18.4   | 18.0   | 0.7                        | -0.4          | 0.3           |
| 50-54                                          | 17.1   | 17.1   | 17.2   | 0.0                        | 0.1           | 0.1           |
| 55-59                                          | 14.8   | 15.2   | 15.3   | 0.4                        | 0.1           | 0.5           |
| Occupational class                             |        |        |        |                            |               |               |
| Upper-level non-manual employees               | 27.4   | 23.9   | 22.2   | -3.5                       | -1.7          | -5.2          |
| Lower-level non-manual employees               | 24.3   | 23.9   | 25.3   | -0.4                       | 1.4           | 1.0           |
| Skilled manual workers                         | 27.9   | 29.5   | 29.2   | 1.6                        | -0.3          | 1.3           |
| Unskilled manual workers                       | 4.7    | 6.2    | 6.6    | 1.5                        | 0.4           | 1.9           |
| Self-employed farmers and agricultural workers | 5.9    | 5.2    | 4.6    | -0.7                       | -0.6          | -1.3          |
| Other self-employed                            | 9.7    | 11.3   | 12.2   | 1.6                        | 0.9           | 2.5           |
| Major region                                   |        |        |        |                            |               |               |
| Southern Finland                               | 30.6   | 30.1   | 31.4   | -0.5                       | 1.3           | 0.8           |
| Western Finland & Åland                        | 21.7   | 21.6   | 21.3   | -0.1                       | -0.3          | -0.4          |
| Eastern Finland                                | 25.0   | 25.4   | 25.0   | 0.4                        | -0.4          | 0.0           |
| Northern Finland                               | 22.7   | 22.9   | 22.3   | 0.2                        | -0.6          | -0.4          |
| Employment sector                              |        |        |        |                            |               |               |
| Private, domestic                              | 67.1   | 66.9   | 67.3   | -0.2                       | 0.4           | 0.2           |
| Private, foreign                               | 10.2   | 9.7    | 9.2    | -0.5                       | -0.5          | -1.0          |
| Public                                         | 22.7   | 23.4   | 23.5   | 0.7                        | 0.1           | 0.8           |
| Physically heavy work                          | 30.7   | 31.7   | 30.1   | 1.0                        | -1.6          | -0.6          |
| Mean days in full work duties                  |        |        |        |                            |               |               |
| -2 year                                        | 292    |        | 286    |                            | 281           |               |
| -1 year                                        | 288    |        | 288    |                            | 279           |               |
| Mean days on full sickness absence             |        |        |        |                            |               |               |
| -2 year                                        | 4.0    |        | 3.3    |                            | 3.1           |               |
| -1 year                                        | 2.9    |        | 2.6    |                            | 2.6           |               |
| Mean days in unemployment                      |        |        |        |                            |               |               |
| -2 year                                        | 6.2    |        | 8.7    |                            | 6.5           |               |
| -1 year                                        | 9.7    |        | 8.1    |                            | 10.3          |               |
| B) Women                                       | 429442 | 429442 | 429442 |                            |               |               |

|                                                |      |      |      |      |      |      |
|------------------------------------------------|------|------|------|------|------|------|
| Age                                            |      |      |      |      |      |      |
| 30-34                                          | 13.7 | 14.7 | 15.1 | 1.0  | 0.4  | 1.4  |
| 35-39                                          | 15.6 | 14.4 | 15.2 | -1.2 | 0.8  | -0.4 |
| 40-44                                          | 18.3 | 17.3 | 15.8 | -1.0 | -1.5 | -2.5 |
| 45-49                                          | 18.5 | 19.1 | 18.5 | 0.6  | -0.6 | 0.0  |
| 50-54                                          | 18.3 | 18.6 | 18.2 | 0.3  | -0.4 | -0.1 |
| 55-59                                          | 15.5 | 15.9 | 17.1 | 0.4  | 1.2  | 1.6  |
| Occupational class                             |      |      |      |      |      |      |
| Upper-level non-manual employees               | 26.5 | 22.4 | 21.8 | -4.1 | -0.6 | -4.7 |
| Lower-level non-manual employees               | 54.6 | 56.8 | 57.3 | 2.2  | 0.5  | 2.7  |
| Skilled manual workers                         | 4.7  | 4.9  | 5.0  | 0.2  | 0.1  | 0.3  |
| Unskilled manual workers                       | 7.4  | 8.4  | 7.8  | 1.0  | -0.6 | 0.4  |
| Self-employed farmers and agricultural workers | 1.5  | 1.5  | 2.0  | 0.0  | 0.5  | 0.5  |
| Other self-employed                            | 5.4  | 5.9  | 6.1  | 0.5  | 0.2  | 0.7  |
| Major region                                   |      |      |      |      |      |      |
| Southern Finland                               | 32.9 | 32.2 | 32.2 | -0.7 | 0.0  | -0.7 |
| Western Finland & Åland                        | 21.6 | 22.3 | 21.9 | 0.7  | -0.4 | 0.3  |
| Eastern Finland                                | 23.6 | 23.4 | 24.1 | -0.2 | 0.7  | 0.5  |
| Northern Finland                               | 21.8 | 22.0 | 21.9 | 0.2  | -0.1 | 0.1  |
| Employment sector                              |      |      |      |      |      |      |
| Private, domestic                              | 44.6 | 45.0 | 45.2 | 0.4  | 0.2  | 0.6  |
| Private, foreign                               | 10.0 | 9.2  | 8.6  | -0.8 | -0.6 | -1.4 |
| Public                                         | 45.4 | 45.8 | 46.2 | 0.4  | 0.4  | 0.8  |
| Physically heavy work                          | 21.5 | 23.7 | 22.5 | 2.2  | -1.2 | 1.0  |
| Mean days in full work duties                  |      |      |      |      |      |      |
| -2 year                                        | 296  | 291  | 284  |      |      |      |
| -1 year                                        | 288  | 288  | 279  |      |      |      |
| Mean days on full sickness absence             |      |      |      |      |      |      |
| -2 year                                        | 5.5  | 4.2  | 3.8  |      |      |      |
| -1 year                                        | 4.3  | 3.6  | 3.3  |      |      |      |
| Mean days in unemployment                      |      |      |      |      |      |      |
| -2 year                                        | 10.9 | 10.3 | 9.0  |      |      |      |
| -1 year                                        | 16.7 | 13.5 | 13.4 |      |      |      |

A) All-cause disability retirement. Men.

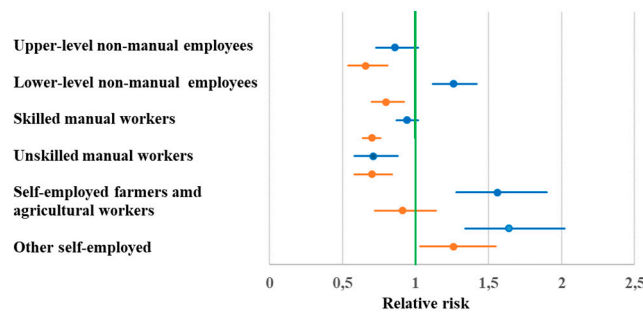

B) All-cause disability retirement. Women.

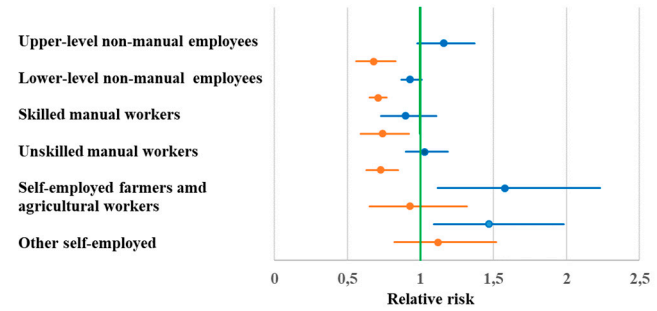

C) Disability retirement due to MSD. Men.  
Women.

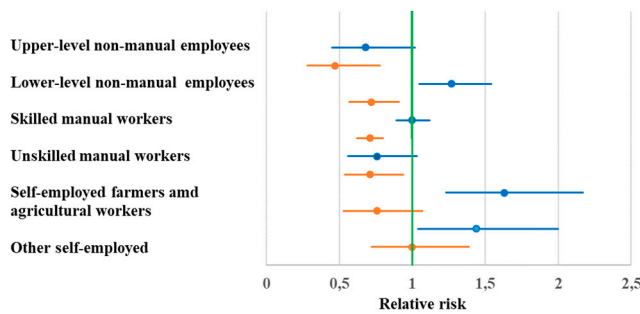

D) Disability retirement due to MSD.

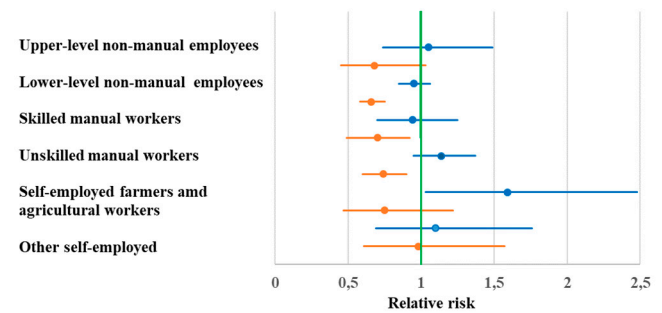

E) Disability retirement due to mental disorders. Men.  
Women.

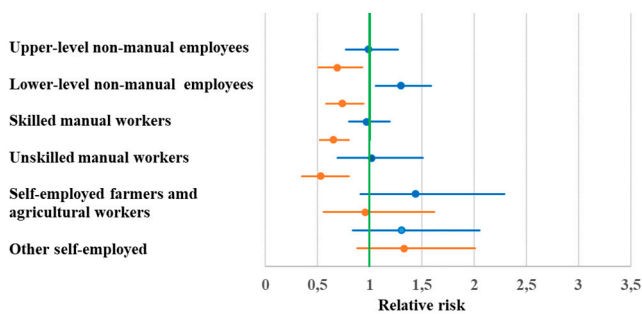

F) Disability retirement due to mental

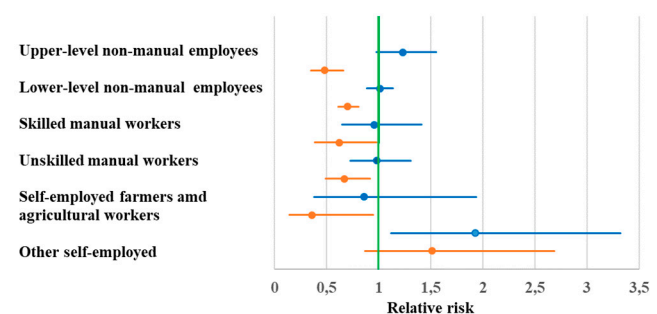

● 2007 ● 2013 — 2010, reference year

**Figure S1.** Age adjusted hazard ratios (HR) and their 95% confidence intervals (95% CI) for all-cause and cause-specific disability retirement by observational year and occupational class among 30–59 years old men and women. Reference group: year 2010 (HR=1.00). (A–B) all-cause disability retirement, (C–D) disability retirement due to musculoskeletal diseases (MSD), and (E–F) disability retirement due to mental disorders. Location of the blue line on the right side from the reference line (green line) indicates the risk of disability retirement in year 2007 was lower than in 2010. Location of the orange line on the left side from the reference line (green line) indicates the risk of disability retirement in year 2013 was lower than in 2010.
